# Supplementary material for: Preparation and characterization of NiO–Ag nanofibers, NiO nanofibers, and porous Ag: towards the development of a highly sensitive and selective non-enzymatic glucose sensor
Source: Royal Society of Chemistry journal article supplement (doi:10.1039/c0jm01968b), 2010-01-01
Supplement: c0jm01968b.pdf [file c0jm01968b.pdf]

## Electronic Supplementary Information

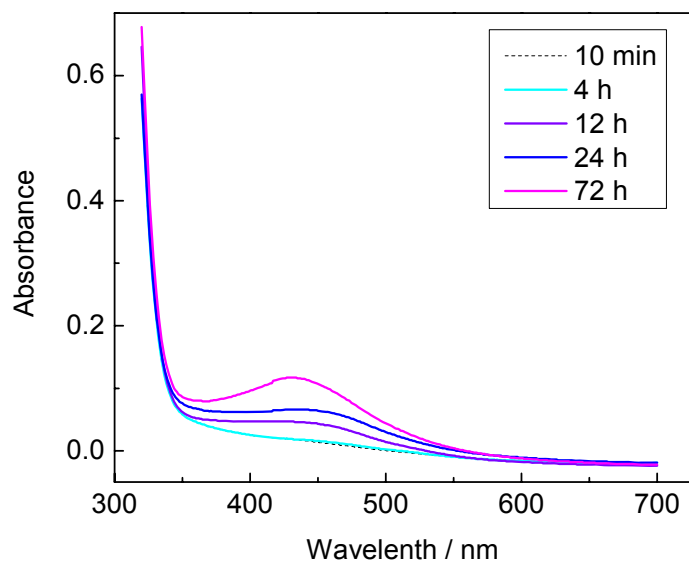

**Fig. S1** Time evolution of the UV-Vis spectra of Ag nanoparticles prepared by mixing  $\text{AgNO}_3$ - $\text{H}_2\text{O}$  with PVP-ethanol at ambient conditions.
